# Supplementary material for: Preparation of boron nitride nanosheetsviapolyethyleneimine assisted sand milling: towards thermal conductivity and insulation applications
Source: Royal Society of Chemistry journal article supplement (doi:10.1039/d1ra05878a), 2021-01-01
Supplement: d1ra05878a1.pdf [file d1ra05878a1.pdf]

*Supporting information for*

## **Preparation of boron nitride nanosheets via polyethyleneimine assisted sand milling: Towards thermal conductivity and insulation application**

Bing Wang, Haifeng Ji, Xiaojie Zhang\*, Xiongwei Qu\*

*Hebei Key Laboratory of Functional Polymers, Department of Polymer Materials and Engineering, Hebei University of Technology, 8 Guangrong Street, Tianjin 300130, P. R. China*

Email: [xwqu@hebut.edu.cn](mailto:xwqu@hebut.edu.cn) (X. Qu), [zhangxj@hebut.edu.cn](mailto:zhangxj@hebut.edu.cn) (X. Zhang)

## X-ray photoelectron spectroscopy (XPS) Measurements

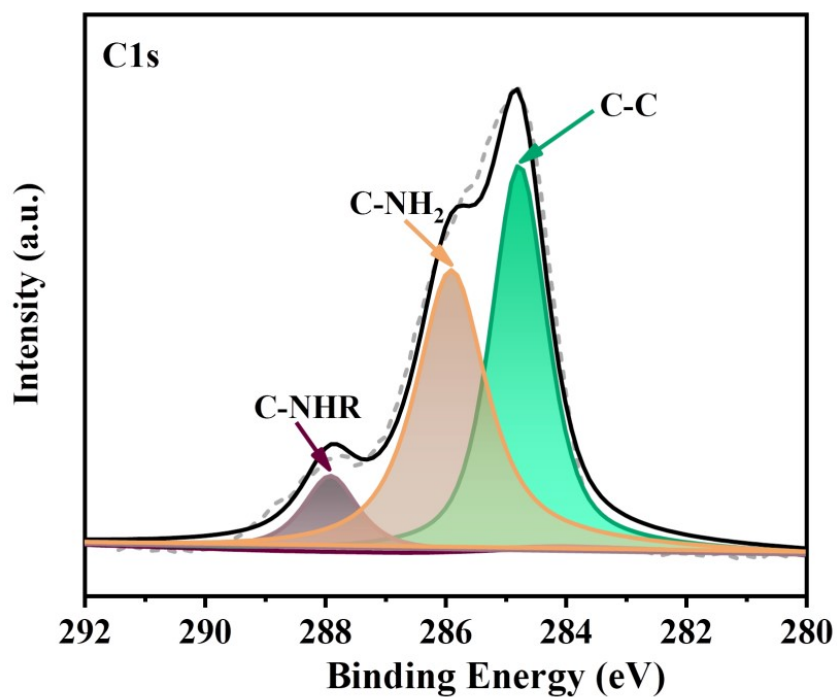

Figure S1 XPS spectra of PEI@BNNS with the high resolution C1s peak-fitting curves.

## Zeta Potentials

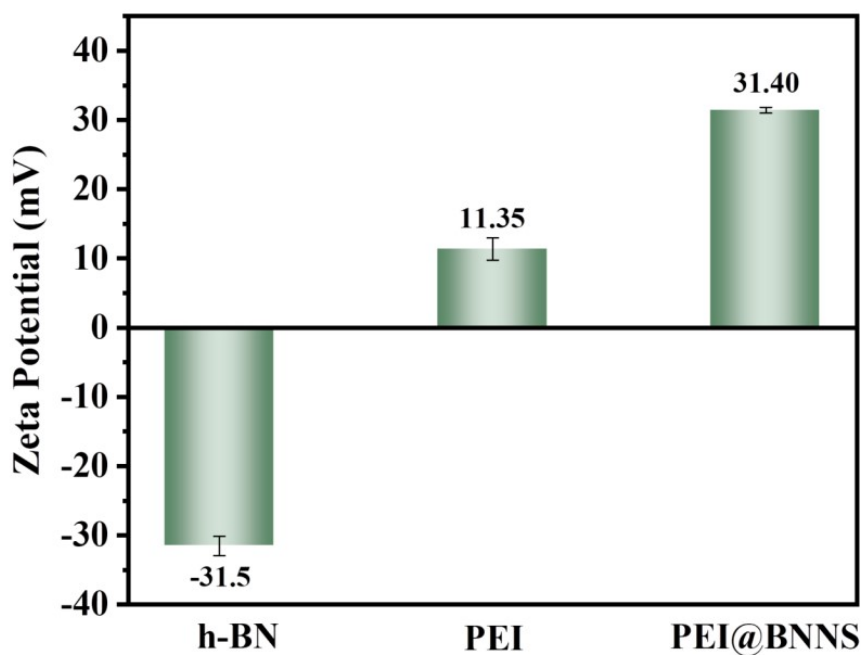

Figure S2 Zeta potential of h-BN, PEI and PEI@BNNS.

## Electron diffraction pattern of the PEI@BNNS

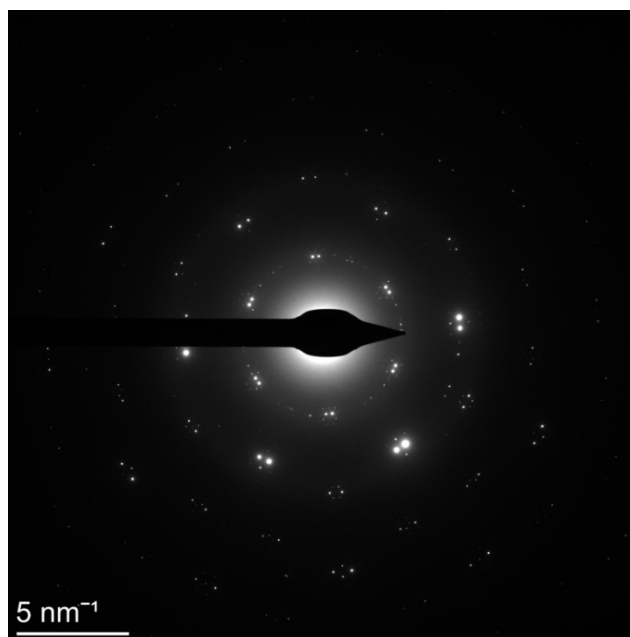

Figure S3 Electron diffraction pattern of the PEI@BNNS.

## X-ray diffraction (XRD) Measurements

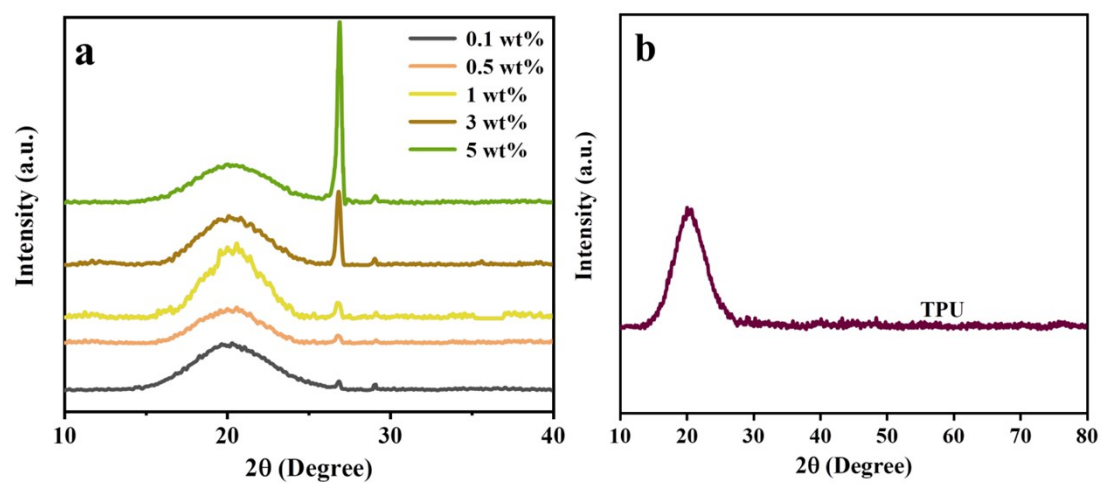

Figure S4 XRD patterns (a) h-BN/TPU composites with different filler loadings. (b) TPU.

## Resistivity Measurements

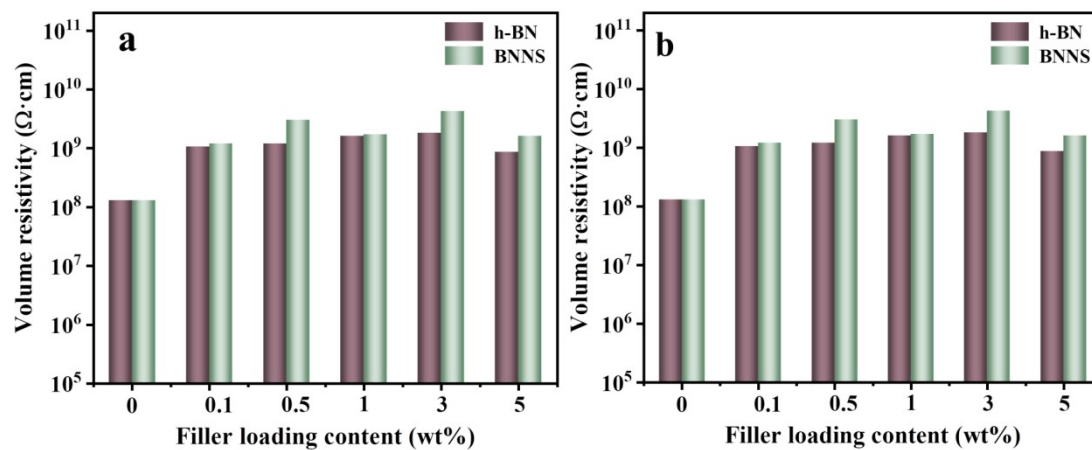

**Figure S5** Volume resistivity (a) and surface resistivity (b) of neat TPU, h-BN/TPU and PEI@BNNS/TPU composites.

## Tensile strength measurements

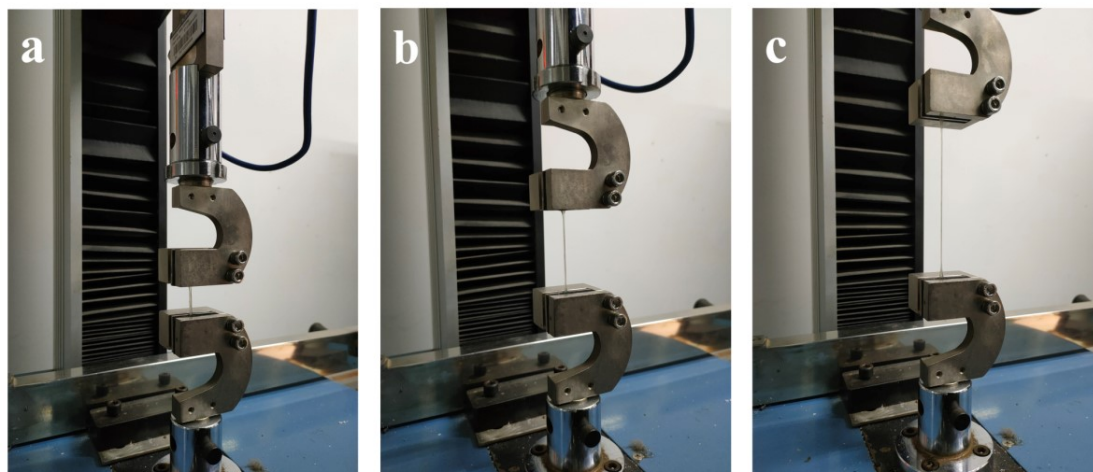

**Figure S6** (a)-(c) 5 wt% PEI@BNNS/TPU composite tensile strength test process.

## Dynamic Mechanical Analysis

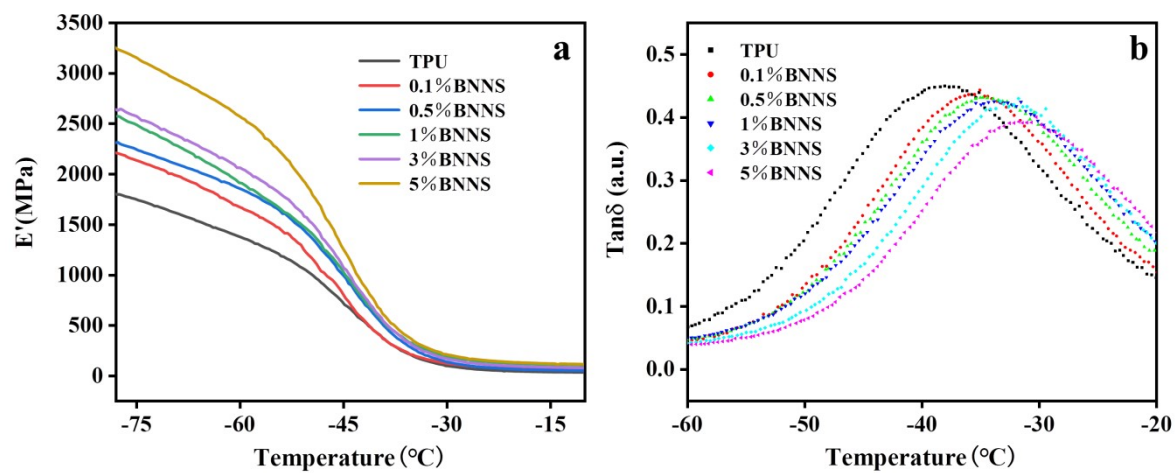

**Figure S7** (a) Dynamic mechanical analysis storage modulus ( $E'$ ) and (b) loss factor ( $\text{tan } \delta$ ) curves of TPU composites.
